# Supplementary material for: Impacts of black carbon on the formation of advection–radiation fog during a haze pollution episode in eastern China
Source: Copernicus journal article supplement (doi:10.5194/acp-19-7759-2019), 2019-06-12
Supplement: Supplementary file 1 [file acp-19-7759-2019-supplement.zip]

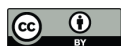

## *Supplement of*

# **Impacts of black carbon on the formation of advection–radiation fog during a haze pollution episode in eastern China**

**Qiuji Ding et al.**

*Correspondence to:* Jianning Sun ([jnsun@nju.edu.cn](mailto:jnsun@nju.edu.cn)) and Xin Huang ([xinhuang@nju.edu.cn](mailto:xinhuang@nju.edu.cn))

- [acp-19-7759-2019-supplement-title-page.pdf](#)
- [SI-acp\\_bc-enhacnce-fog.pdf](#)
- [cartoon for evolution of fog.gif](#)

The copyright of individual parts of the supplement might differ from the CC BY 4.0 License.
