# Supplementary material for: Impacts of black carbon on the formation of advection–radiation fog during a haze pollution episode in eastern China
Source: Copernicus journal article supplement (doi:10.5194/acp-19-7759-2019), 2019-06-12
Supplement: Supplementary file 2 [file acp-19-7759-2019-supplement.zip]

Archive with 3 entries (3 files):
- acp-19-7759-2019-supplement-title-page.pdf
- cartoon for evolution of fog.gif
- SI-acp_bc-enhacnce-fog.pdf
