# Supplementary figures and images for: Impacts of black carbon on the formation of advection–radiation fog during a haze pollution episode in eastern China
Source: Copernicus journal article supplement (doi:10.5194/acp-19-7759-2019), 2019-06-12

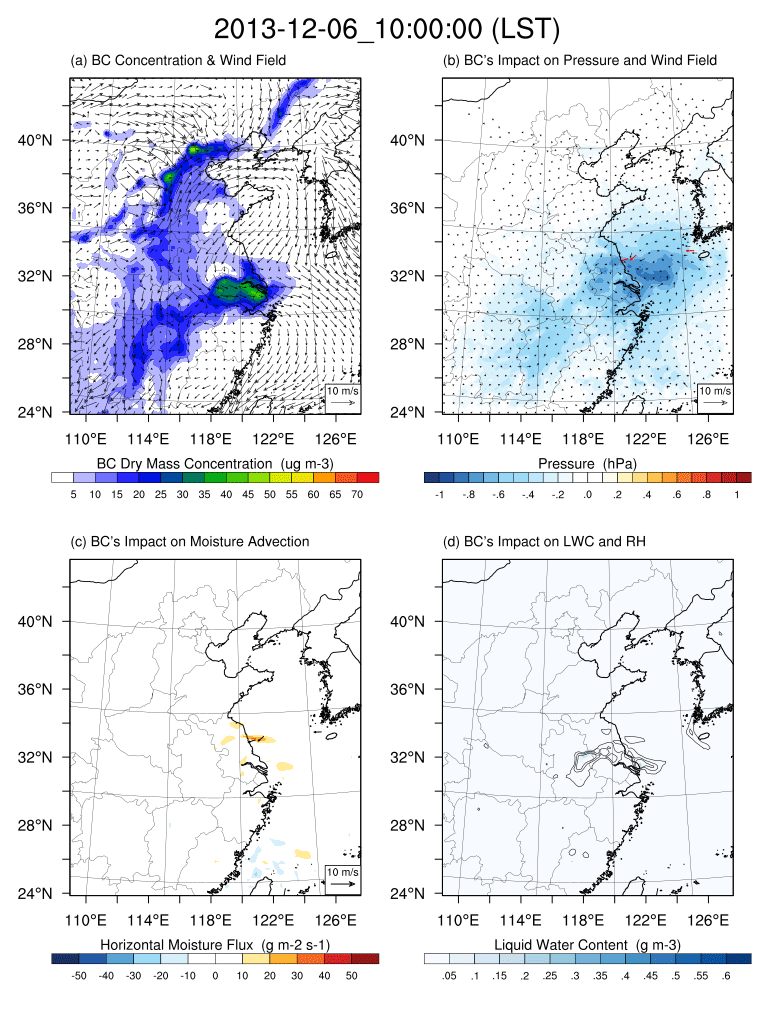

Supplement: Supplementary file 2 [file acp-19-7759-2019-supplement.zip › cartoon for evolution of fog.gif]
